# Supplementary material for: Integrative Tissue-Specific Functional Annotations in the Human Genome Provide Novel Insights on Many Complex Traits and Improve Signal Prioritization in Genome Wide Association Studies
Source: PLoS Genet. 2016 Apr 8;12(4):e1005947. doi: 10.1371/journal.pgen.1005947 (PMC4825932; doi:10.1371/journal.pgen.1005947)
Supplement: S3 Table — (XLSX) [file pgen.1005947.s013.xlsx]

## Sheet: Sheet1
	Name	Starta	Stopa	Brain	GI	Lung	Heart	Blood	Muscle	Epithelium
Genes in HBB gene complex	HBB	5246696	5248301	0.0232	0.01	0.0017	0.0013	0.7336	0.0008	0.0029
	HBD	5254059	5255858	0.0013	0.0138	0.3161	0.0014	0.8895	0.001	0.034
	HBBP1	5263184	5264822	0.0012	0.0097	0.0527	0.002	0.4709	0.0008	0.0258
	HBG1	5269502	5271087	0.001	0.0016	0.0017	0.0014	0.0668	0.0008	0.003
	HBG2	5274421	5276011	0.001	0.0015	0.0018	0.0013	0.143	0.0008	0.0033
	HBE1	5289580	5291373	0.0135	0.0007	0.0017	0.0015	0.0003	0.0008	0.0034
CRMs in HBB gene complex	3’HS1	5226013	5226493	0.0063	0.0089	0.0346	0.0186	0.009	0.013	0.3177
	HBB_3’enh	5245876	5246140	0.0014	0.0005	0.0022	0.0013	0.9062	0.0008	0.003
	HBB_prom	5248301	5248556	0.0018	0.015	0.0016	0.0013	0.0003	0.0008	0.0023
	HBD_prom	5255713	5256160	0.0014	0.0005	0.3528	0.0013	0.9999	0.0008	0.0595
	HBG1_3’enh	5268365	5269114	0.001	0.0005	0.0193	0.0013	0.6284	0.0008	0.0216
	HBG1_prom	5271086	5271290	0.001	0.0005	0.0017	0.0013	0.0003	0.0008	0.003
	HBG1_up	5271291	5271813	0.001	0.0005	0.0201	0.0013	0.0494	0.0008	0.0029
	HBG2_prom	5276011	5276214	0.001	0.0005	0.0017	0.0013	0.004	0.0008	0.003
	HBG2_up	5276215	5276745	0.001	0.0005	0.027	0.0013	0.0535	0.0043	0.0204
	HBE1_prom	5291175	5291343	0.001	0.0011	0.0017	0.0016	0.0003	0.0008	0.0047
	HBE1_up	5291344	5291610	0.0041	0.0006	0.0017	0.012	0.0008	0.0008	0.0031
	HBE1_PRB	5292690	5292886	0.001	0.0005	0.0016	0.0021	0.0003	0.0008	0.0015
	HBE1_NRB	5292886	5292928	0.001	0.0005	0.0017	0.0013	0.0003	0.0008	0.003
	HBE1_PRA	5293982	5294081	0.001	0.0005	0.0017	0.0013	0.3566	0.0008	0.003
	HBE1_NRA	5294082	5294308	0.001	0.0005	0.0017	0.0013	0.0535	0.0008	0.003
	HS1	5296894	5297517	0.001	0.0007	0.0403	0.0013	0.9625	0.004	0.1062
	HS2_pos	5301795	5302089	0.2231	0.4767	0.0604	0.4046	0.6358	0.0336	0.7855
	HS2_neg	5302090	5302174	0.0833	0.4471	0.0635	0.0094	1	0.0051	0.9195
	HS3	5305882	5306169	0.001	0.0005	0.0017	0.0013	0.5671	0.0008	0.0044
	HS3.1	5306356	5306418	0.001	0.0005	0.0022	0.0013	0.0233	0.0008	0.003
	HS3.2	5306814	5307392	0.001	0.0005	0.0071	0.0013	0.468	0.0008	0.9783
	HS4	5309419	5309707	0.001	0.2965	0.5436	0.0013	0.4414	0.0008	0.9378
	HS5	5312534	5312694	0.001	0.0163	0.0543	0.0013	0.089	0.0008	0.8171
a hg19 coordinates
