# Supplementary material for: Integrative Tissue-Specific Functional Annotations in the Human Genome Provide Novel Insights on Many Complex Traits and Improve Signal Prioritization in Genome Wide Association Studies
Source: PLoS Genet. 2016 Apr 8;12(4):e1005947. doi: 10.1371/journal.pgen.1005947 (PMC4825932; doi:10.1371/journal.pgen.1005947)
Supplement: S5 Table — (XLSX) [file pgen.1005947.s015.xlsx]

## Sheet: Sheet1
Name	Locationa	Brain	GI	Lung	Heart	Blood	Muscle	Epithelium
MYH6	chr14: 23851199-23877486	0.0562	0.0055	0.0052	0.605	0.0356	0.1749	0.0833
MYH7	chr14: 23881947-23904870	0.2315	0.0199	0.0051	0.9788	0.0028	0.7498	0.0739
mir208a	chr14: 23857805-23857875	0.001	0.0011	0.0026	0.2331	0.0004	0.004	0.2066
mir208b	chr14: 23887196-23887272	0.001	0.0011	0.0028	1	0.0004	0.4221	0.0047
hs1670	chr14: 23906587-23908214	0.9203	0.966	0.0306	1	0.1639	1	0.2983
hs2330	chr14: 23911613-23912923	0.234	0.2818	0.0024	0.9999	0.0025	0.9999	0.1892
a Coordinates are based on hg19.
