# Supplementary material for: Integrative Tissue-Specific Functional Annotations in the Human Genome Provide Novel Insights on Many Complex Traits and Improve Signal Prioritization in Genome Wide Association Studies
Source: PLoS Genet. 2016 Apr 8;12(4):e1005947. doi: 10.1371/journal.pgen.1005947 (PMC4825932; doi:10.1371/journal.pgen.1005947)
Supplement: S6 Table — (XLSX) [file pgen.1005947.s016.xlsx]

## Sheet: Sheet1
Group	EIDa	Anatomy	Standardized Epigenome Name	Type
ESC	E002	ESC	ES-WA7 Cells	PrimaryCulture
	E008	ESC	H9 Cells	PrimaryCulture
	E001	ESC	ES-I3 Cells	PrimaryCulture
	E015	ESC	HUES6 Cells	PrimaryCulture
	E014	ESC	HUES48 Cells	PrimaryCulture
	E016	ESC	HUES64 Cells	PrimaryCulture
	E003	ESC	H1 Cells	PrimaryCulture
	E024	ESC	ES-UCSF4 Cells	PrimaryCulture
Fetal cells	E017	LUNG	IMR90 fetal lung fibroblasts Cell Line	CellLine
	E093	THYMUS	Fetal Thymus	PrimaryTissue
	E082	BRAIN	Fetal Brain Female	PrimaryTissue
	E081	BRAIN	Fetal Brain Male	PrimaryTissue
	E089	MUSCLE	Fetal Muscle Trunk	PrimaryTissue
	E090	MUSCLE_LEG	Fetal Muscle Leg	PrimaryTissue
	E083	HEART	Fetal Heart	PrimaryTissue
	E092	GI_STOMACH	Fetal Stomach	PrimaryTissue
	E085	GI_INTESTINE	Fetal Intestine Small	PrimaryTissue
	E084	GI_INTESTINE	Fetal Intestine Large	PrimaryTissue
	E086	KIDNEY	Fetal Kidney	PrimaryTissue
	E088	LUNG	Fetal Lung	PrimaryTissue
	E080	ADRENAL	Fetal Adrenal Gland	PrimaryTissue
	E099	PLACENTA	Placenta Amnion	PrimaryTissue
	E091	PLACENTA	Placenta	PrimaryTissue
a Epigenome ID in Roadmap project
